# Supplementary material
Source: PubMed Central journal article supplement (PMC2821684)
Supplement: NIHMS173315-supplement-SI.pdf [file NIHMS173315-supplement-SI.pdf]

# Supporting Information

## Benzothiazines in Synthesis. Formal Total Synthesis of Pseudopteroxazole

*Michael Harmata,\* Zhengxin Cai and Yugang Chen*

Department of Chemistry, University of Missouri, Columbia, Missouri 65211

### Table of Contents

|                                                                         |         |
|-------------------------------------------------------------------------|---------|
| Table of Contents                                                       | S1      |
| General                                                                 | S2      |
| Procedure and analytical data of Compound <b>7</b>                      | S3      |
| Procedure and analytical data of Compound <b>8</b>                      | S3–S4   |
| Procedure and analytical data of Compound <b>14</b>                     | S4      |
| Procedure and analytical data of Compound <b>15</b>                     | S5      |
| Procedure Analytical data of the Heck coupling product <b>16</b>        | S6      |
| Spectra ( <sup>1</sup> H and <sup>13</sup> C NMR) of Compound <b>7</b>  | S7–S8   |
| Spectra ( <sup>1</sup> H and <sup>13</sup> C NMR) of Compound <b>8</b>  | S9–S10  |
| Spectra ( <sup>1</sup> H and <sup>13</sup> C NMR) of compound <b>10</b> | S11–S12 |
| Spectra ( <sup>1</sup> H and <sup>13</sup> C NMR) of compound <b>12</b> | S13–S14 |
| Spectra ( <sup>1</sup> H and <sup>13</sup> C NMR) of compound <b>16</b> | S15–S16 |
| Spectra ( <sup>1</sup> H and <sup>13</sup> C NMR) of compound <b>13</b> | S17–S18 |
| Spectra ( <sup>1</sup> H and <sup>13</sup> C NMR) of compound <b>14</b> | S19–S20 |
| Spectra ( <sup>1</sup> H and <sup>13</sup> C NMR) of compound <b>15</b> | S21–S22 |
| Spectra ( <sup>1</sup> H NMR) of compound <b>4</b>                      | S23     |

### General Information:

All air and moisture sensitive reactions were carried out in flame-dried glassware under an argon or nitrogen atmosphere. Reactive liquid reagents (LHMDS, etc.) were measured and transferred by gastight syringes through rubber septa. Tetrahydrofuran (THF) was freshly distilled over sodium benzophenone ketyl. Toluene was distilled from  $\text{CaH}_2$ . The reaction mixture was concentrated by using a rotary evaporator attached to a water aspirator. Residue solvents were usually removed under reduced pressure using vacuum pump (approximately 1mm Hg).

Flash chromatographic separations were carried out on silica gel (230-400 mesh) with ACS reagent grade solvents. Analytical thin layer chromatography was performed on glass-backed silica gel plates with F254 indicator. Compounds were visualized under UV light or by developing in iodine, vanillin, phosphomolybdic acid solution or with potassium permanganate solution followed by heating in a hot plate to approximately 350 °C. Melting points were determined with a melting point apparatus.

$^1\text{H}$  NMR spectra were recorded in Fourier transform mode at 250, 300 or 500 MHz, respectively, as  $\text{CDCl}_3$  solutions with tetramethylsilane ( $\delta = 0$  ppm) as the internal standard.  $^{13}\text{C}$  NMR spectra were recorded on the same instruments at 62.5, 75 or 125 MHz, respectively, with  $\text{CDCl}_3$  ( $\delta = 77$  ppm) as the internal reference.  $^{31}\text{P}$  NMR spectra were recorded on the same instruments at 101 MHz, respectively, with 85%  $\text{H}_3\text{PO}_4$  ( $\delta = 0$  ppm) as the external standard. Chemical shifts ( $\delta$ ) were reported in parts per million (ppm). Multiplicities were reported as s (singlet), b (broad), d (doublet), t (triplet), q (quartet), m (multiplet), and dd (doublet of doublet), etc. In  $^1\text{H}$  NMR spectra of diastereomeric mixtures, the signals for individual isomers were reported when possible. Infrared spectra were recorded on an FT-IR spectrometer. Optical rotations were recorded on a polarimeter with sodium D line at the temperatures as indicated in the experimental for specific compounds. High resolution mass spectra were obtained on a magnetic sector instrument with a resolution greater than 10,000.

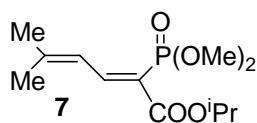

**(E/Z)-isopropyl 2-(dimethoxyphosphoryl)-5-methylhexa-2,4-dienoate (7):** A mixture of 3-methylbut-2-enal (5 mL, 0.065 mol) and trimethyl phosphonoacetate (5.26 mL, 0.033 mol) in THF (300 mL) with molecular sieves (4 Å) was placed in a 1 L round-bottom flask under an argon atmosphere. To this solution,  $\text{Ti}(\text{O}^i\text{Pr})_4$  (29 mL, 0.098 mol) was added. Then TEA (17 mL, 0.13 mol) was added over 30 min, and the mixture was stirred at 0 °C for 7 h. The reaction mixture was poured into 1 N HCl and vigorously stirred at rt for 1 h. It was extracted by ethyl acetate (3x300 mL) and the extract was washed with 300 mL saturated sodium bicarbonate solution and 300 mL brine. The organic layer was dried with anhydrous sodium sulfate and the solvent was evaporated, affording the product as a mixture of *E/Z* (2:1) isomers (5.82 g, 92%). (*Z*)-isomer: IR (neat): 2978, 2953, 2848, 1699, 1618, 1564, 1250, 1025, 829  $\text{cm}^{-1}$ ;  $^1\text{H}$  NMR ( $\text{CDCl}_3$ , 500 MHz)  $\delta$  8.20 (dd, 1 H,  $J = 12.5, 44.5$  Hz), 7.22 (dd, 1 H,  $J = 1.0, 12.0$  Hz), 5.12 (septet, 1 H,  $J = 6.5$  Hz), 3.78 (s, 3 H), 3.75 (s, 3 H), 2.00 (s, 3H), 1.98 (s, 3H), 1.30 (d, 6 H,  $J = 6.0$  Hz);  $^{13}\text{C}$  NMR ( $\text{CDCl}_3$ , 125 MHz)  $\delta$  165.9 (d,  $J = 15.0$  Hz), 155.2 (d,  $J = 2.5$  Hz), 152.9 (d,  $J = 10.0$  Hz), 122.4 (d,  $J = 5.0$  Hz), 115.6 (d,  $J = 186.0$  Hz), 68.7, 52.6 (d,  $J = 5.0$  Hz), 27.6, 21.7 (d,  $J = 10.0$  Hz), 19.0; HRMS calcd for  $\text{C}_{12}\text{H}_{21}\text{O}_5\text{PNa}$   $[\text{M}+\text{Na}]^+$  299.1019; Found: 299.1006;  $^{31}\text{P}$  NMR ( $\text{CDCl}_3$ , 250 MHz)  $\delta$  23.4 (85%  $\text{H}_3\text{PO}_4$  as external standard).

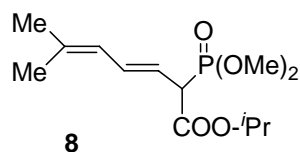

**(E)-isopropyl 2-(dimethoxyphosphoryl)-6-methylhepta-3,5-dienoate (8):** To a solution of 7 (4.86 g, 0.018 mol) in ether (20 mL) in a 50 mL round-bottom flask, a 0.5 M diazomethane solution in ether (0.088 mL, 0.045 mol) at 0 °C was added dropwise. The reaction was warmed to rt and stirred for 12 h. After the reaction was complete, the solvent was evaporated and the crude product was heated at 100 °C for 1 h. After flash

chromatography with 50% ethyl acetate in hexanes, a colorless oil 4.54 g (84% for two steps) was obtained, the product having only an (*E*) configuration. IR (neat): 2983, 2851, 1728, 1450, 1262, 1102, 1025, 829, 796  $\text{cm}^{-1}$ ;  $^1\text{H}$  NMR ( $\text{CDCl}_3$ , 500 MHz)  $\delta$  6.44 (ddd, 1H,  $J = 5.0, 11.0, 15.5$  Hz), 5.85 (d, 1H,  $J = 11.0$  Hz), 5.65 (ddd, 1H,  $J = 7.0, 9.5, 16.0$  Hz), 5.07 (septet, 1H,  $J = 6.5$  Hz), 3.81 (d, 3H,  $J = 11.0$  Hz), 3.79 (d, 3H,  $J = 11.0$  Hz), 3.75 (dd, 1H,  $J = 9.5, 24.0$  Hz), 1.78 (s, 3H), 1.76 (s, 3H), 1.28 (d, 3H,  $J = 4.5$  Hz), 1.26 (d, 3H,  $J = 4.0$  Hz);  $^{13}\text{C}$  NMR ( $\text{CDCl}_3$ , 125 MHz)  $\delta$  167.0 (d,  $J = 5.0$  Hz), 136.9 (d,  $J = 5.0$  Hz), 131.9 (d,  $J = 12.5$  Hz), 124.0 (d,  $J = 5.0$  Hz), 118.5 (d,  $J = 12.5$  Hz), 69.2, 53.7 (d,  $J = 7.5$  Hz), 53.4 (d,  $J = 7.5$  Hz), 50.6, 49.6 (d,  $J = 130.0$  Hz), 25.8, 21.5 (d,  $J = 10.0$  Hz), 18.2; HRMS calcd for  $\text{C}_{13}\text{H}_{23}\text{O}_5\text{PNa}$   $[\text{M}+\text{Na}]^+$  313.1175; Found: 313.1171.

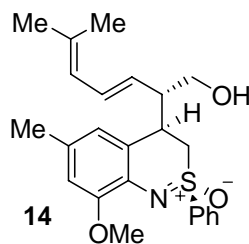

**(2*S*,3*E*)-6-Methyl-2-[(2*R*,4*R*)-2-oxido-2-phenyl-3,4-dihydro-2*H*<sup>4</sup>,1-benzothiazin-4-yl]hepta-3,5-dien-1-ol (**14**):** To a solution of the ester **13** (383mg, 0.819 mmol) in 8 mL THF, was slowly added 8.19 mL of DIBAL (1M in THF) at 0 °C. After 2 h, it was carefully quenched with ethyl acetate and water. After filtration, followed by washing with 20 mL ethyl acetate, it was concentrated. After flash chromatography (50% ethyl acetate in hexanes), 0.285 g (88%) of **14** was obtained as a semisolid. IR (film): 3448, 2962, 2917, 1577, 1462, 1250, 1102, 1017  $\text{cm}^{-1}$ ;  $^1\text{H}$  NMR ( $\text{CDCl}_3$ , 500 MHz)  $\delta$  8.10-8.12 (m, 2H), 7.63-7.66 (m, 1H), 7.54-7.57 (m, 2H), 6.69 (s, 1H), 6.69 (s, 1H), 6.40 (dd, 1H,  $J = 11.0, 15.5$  Hz), 5.82 (d, 1H,  $J = 10.5$  Hz), 5.51 (dd, 1H,  $J = 9.0, 15.5$  Hz), 3.89 (s, 3H,  $\text{CH}_3$ ), 3.69 (ddd, 1H,  $J = 4.0, 7.0, 11.0$  Hz), 3.46-3.55 (m, 3H), 2.98-3.13 (m, 1H), 2.32 (s, 3H), 1.77 (s, 3H), 1.73 (s, 3H), 1.35 (dd, 1H,  $J = 4.5, 6.5$  Hz);  $^{13}\text{C}$  NMR ( $\text{CDCl}_3$ , 125 MHz)  $\delta$  152.8, 139.2, 136.1, 133.9, 132.2, 131.0, 130.2, 129.5, 128.4, 125.1, 124.7,

119.1, 111.6, 62.7, 56.2, 50.3, 45.0, 37.5, 26.2, 21.7, 18.6; HRMS calcd for  $C_{24}H_{29}NO_3SNa$   $[M+Na]^+$  434.1760; Found: 434.1751;  $[\alpha]_D^{25} = -4.04$  (c 3.02,  $CHCl_3$ ).

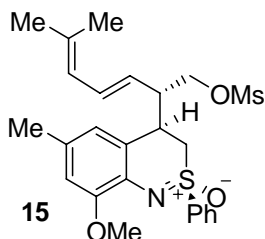

**(2*R*,4*R*)-4-[(1*S*,2*E*)-1-Methanesulfonyloxymethyl-5-methyl-2,4-hexadienyl]-3,4-dihydro-8-methoxy-6-methyl-2-phenyl-2γ4-2,1-benzothiazine-2-oxide (15)**: To a solution of alcohol **14** (48 mg, 0.116 mmol) in 2 mL  $CH_2Cl_2$  was added TEA (33  $\mu$ l, 24 mg, 0.24 mmol) and mesyl chloride (14  $\mu$ l, 21mg, 0.18 mmol) at 0 °C. The reaction was allowed to reach rt and was stirred for 17 h. It was quenched with 1 mL saturated  $NH_4Cl$ , extracted with 2 mL  $CH_2Cl_2$ , washed with 2 mL brine, dried with  $Na_2SO_4$ , and concentrated in vacuo. After chromatography (50% ethyl acetate in hexanes), 45 mg (79%) of **15** was obtained as a white semisolid. IR (film): 3060, 2929, 2226, 1569, 1462, 11348, 1242, 1172, 1103, 964, 833, 731, 682  $cm^{-1}$ ;  $^1H$  NMR ( $CDCl_3$ , 500 MHz)  $\delta$  8.11 (d, 2H,  $J = 7.5$  Hz), 7.66 (dd, 1H,  $J = 7.0, 8.0$  Hz), 7.56 (dd, 2H,  $J = 8.0, 7.5$  Hz), 6.70 (s, 1H), 6.67 (s, 1H), 6.37 (dd, 1H,  $J = 11.0, 15.5$  Hz), 5.80 (d, 1H,  $J = 11.0$  Hz), 5.47 (dd, 1H,  $J = 7.5, 15.0$  Hz), 4.24 (dd, 1H,  $J = 4.5, 10.0$  Hz), 4.05 (dd, 1H,  $J = 7.5, 10.0$  Hz), 3.88 (s, 3H), 3.61 (dt, 1H,  $J = 11, 5$  Hz), 3.51 (dd, 1H,  $J = 4.5, 13.0$  Hz), 3.43 (m, 1H), 3.06 (dd, 1H,  $J = 11.5, 12.5$  Hz), 2.90 (s, 3H), 2.33 (s, 3H), 1.77 (s, 3H), 1.72 (s, 3H);  $^{13}C$  NMR ( $CDCl_3$ , 125 MHz)  $\delta$  152.7, 138.5, 136.6, 133.8, 131.9, 130.9, 130.2, 129.3, 129.2, 126.0, 124.2, 123.5, 118.8, 111.6, 69.0, 56.0, 49.6, 41.9, 37.3, 37.2, 25.9, 21.4, 18.3; HRMS calcd for  $C_{25}H_{31}NO_5S_2Na$   $[M+Na]^+$  512.1536; Found: 512.1526;  $[\alpha]_D^{25} = -13.82$  (c 0.55,  $CHCl_3$ ).

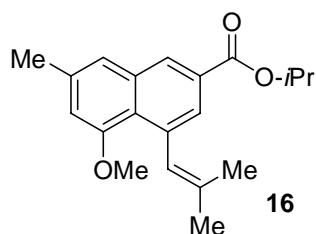

The Heck coupling product **16** is a byproduct that was formed in trace amount under the Buchwald coupling condition indicated in the main text. It was isolated as a colorless oil: IR (neat): 2978, 2917, 1708, 1573, 1454, 1372, 1274, 1221, 1136, 1103  $\text{cm}^{-1}$ ;  $^1\text{H}$  NMR ( $\text{CDCl}_3$ , 500 MHz)  $\delta$  8.28 (d, 1H,  $J = 1.5$  Hz), 7.67 (s, 1H), 7.30 (s, 1H), 6.94 (s, 1H), 6.73 (d, 1H,  $J = 1.0$  Hz), 5.29 (septet, 1H, 6.0 Hz), 3.87 (s, 3H), 1.96 (d, 3H,  $J = 1.0$  Hz), 1.71 (d, 3H,  $J = 1.5$  Hz), 1.40 (d, 6H,  $J = 6.5$  Hz);  $^{13}\text{C}$  NMR ( $\text{CDCl}_3$ , 125 MHz)  $\delta$  166.4, 157.3, 136.1, 135.7, 135.3, 130.9, 128.5, 128.0, 127.7, 126.8, 124.9, 121.6, 110.4, 68.3, 55.9, 26.0, 22.0, 21.7, 19.1; HRMS calcd for  $\text{C}_{20}\text{H}_{24}\text{O}_3\text{Na}$   $[\text{M}+\text{Na}]^+$  335.1618; Found: 335.1618.

CAI-PA-conjugated diene-1H NMR

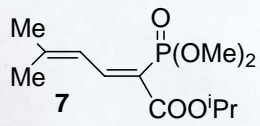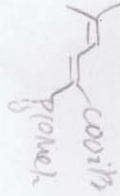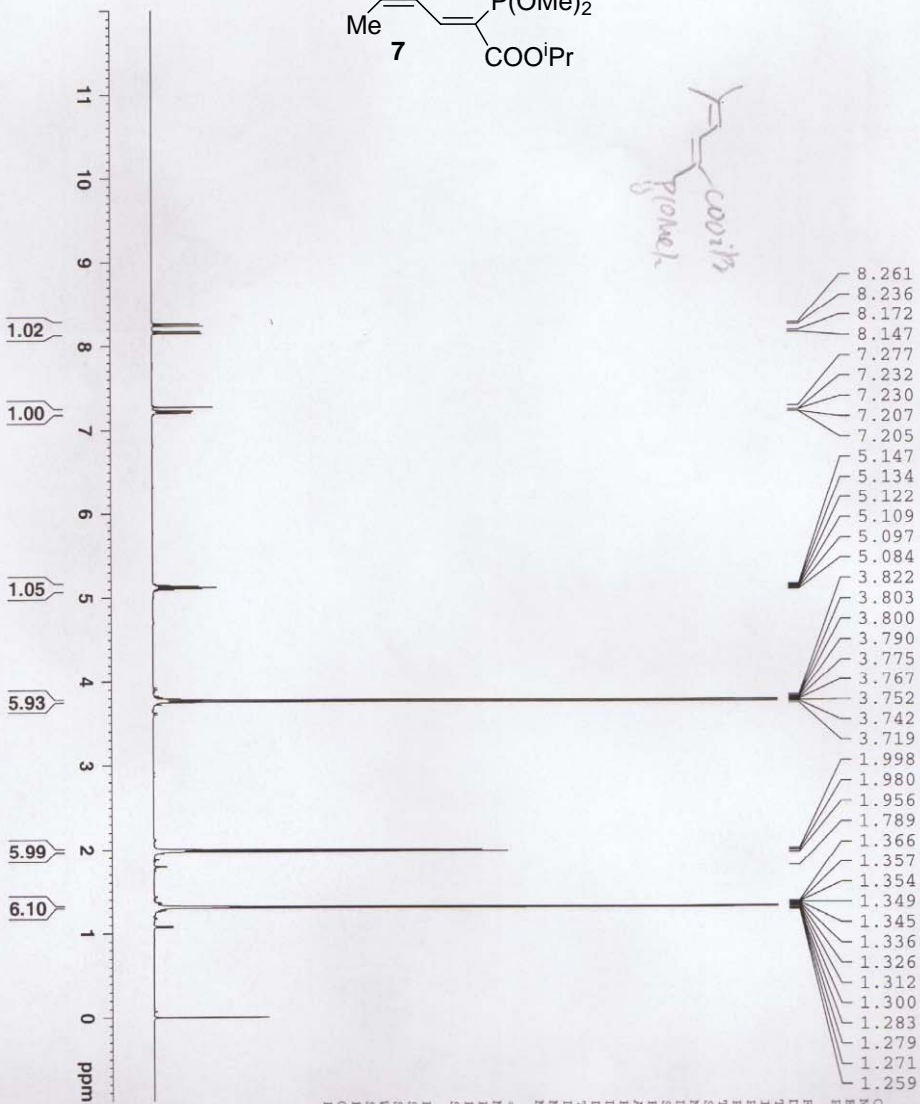

Current Data Parameters  
NAME CAI-PA-conjugated diene  
EXPNO 1  
PROCNO 1

F2 - Acquisition Parameters  
Date\_ 20090121  
Time 14.02  
INSTRUM spect  
PROBHD 5 mm CPXC-1H-  
PULPROG zgpg30  
TD 65536  
SOLVENT CDCl3  
NS 8  
DS 2  
SWH 10330.578 Hz  
FIDRES 0.15962 Hz  
AQ 3.17122 sec  
RG 113  
DW 48.400 usec  
DE 6.00 usec  
TE 300.0 K  
D1 1.00000000 sec  
MCREST 0.00000000 sec  
MCWRK 0.01500000 sec

\*\*\*\*\* CHANNEL f1 \*\*\*\*\*  
NUC1 1H  
P1 8.00 usec  
PL1 4.30 dB  
SFO1 500.135009 MHz

F2 - Processing parameters  
SI 32768  
SF 500.130029 MHz  
WDW EM  
SSB 0  
LB 0.30 Hz  
GB 0  
PC 1.00

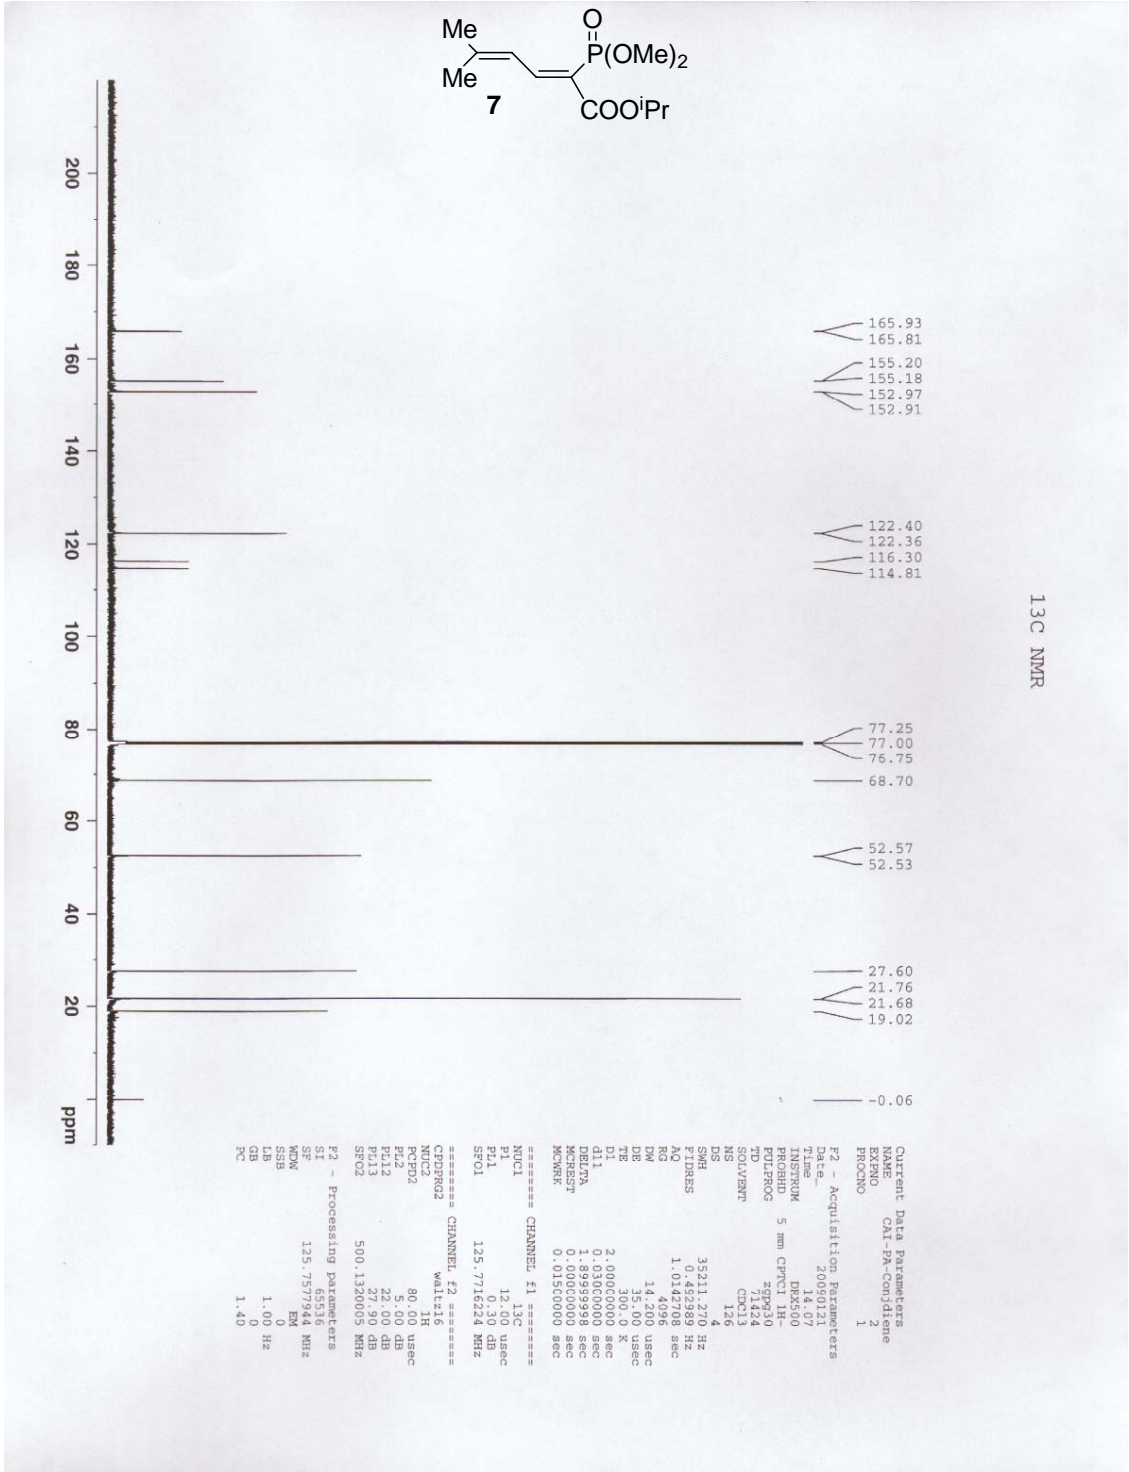



CAI-PA-4B-Colorless oil-1H NMR

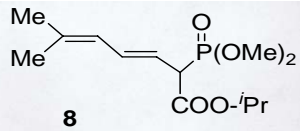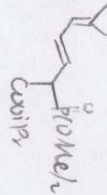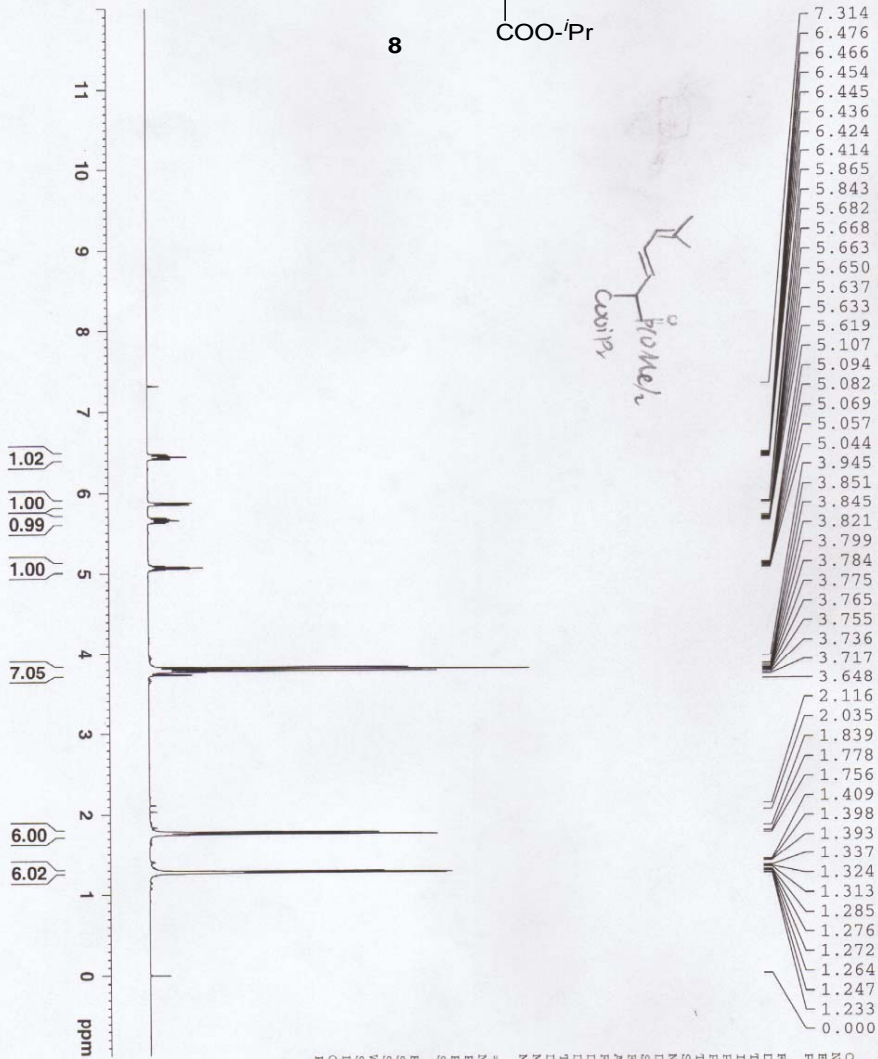

Current Data Parameters  
 NAME CAI-PA-4B  
 EXPNO 1  
 PROCNO 1

F2 - Acquisition Parameters  
 Date\_ 20090111  
 Time 22.29  
 INSTRUM DRX500  
 PROBRD 5 mm CPXI 1H-  
 PULPROG zgpg30  
 T1 6.50  
 T12 6.50  
 T13 6.50  
 SOLVENT CDCl3  
 NS 8  
 DS 2  
 SWH 10330.578 Hz  
 FIDRES 0.157632 Hz  
 AQ 3.1719922 sec  
 RG 653  
 DE 48.400 usec  
 TE 300.0 K  
 D1 1.00000000 sec  
 MCREST 0.00000000 sec  
 MCWRR 0.01500000 sec

===== CHANNEL f1 =====  
 NUC1 1H  
 P1 8.00 usec  
 PL1 4.30 dB  
 SFO1 500.1335009 MHz

F2 - Processing parameters  
 SI 32768  
 SF 500.1299870 MHz  
 WDW EM  
 SSB 0  
 LB 0.30 Hz  
 GB 0  
 PC 1.00

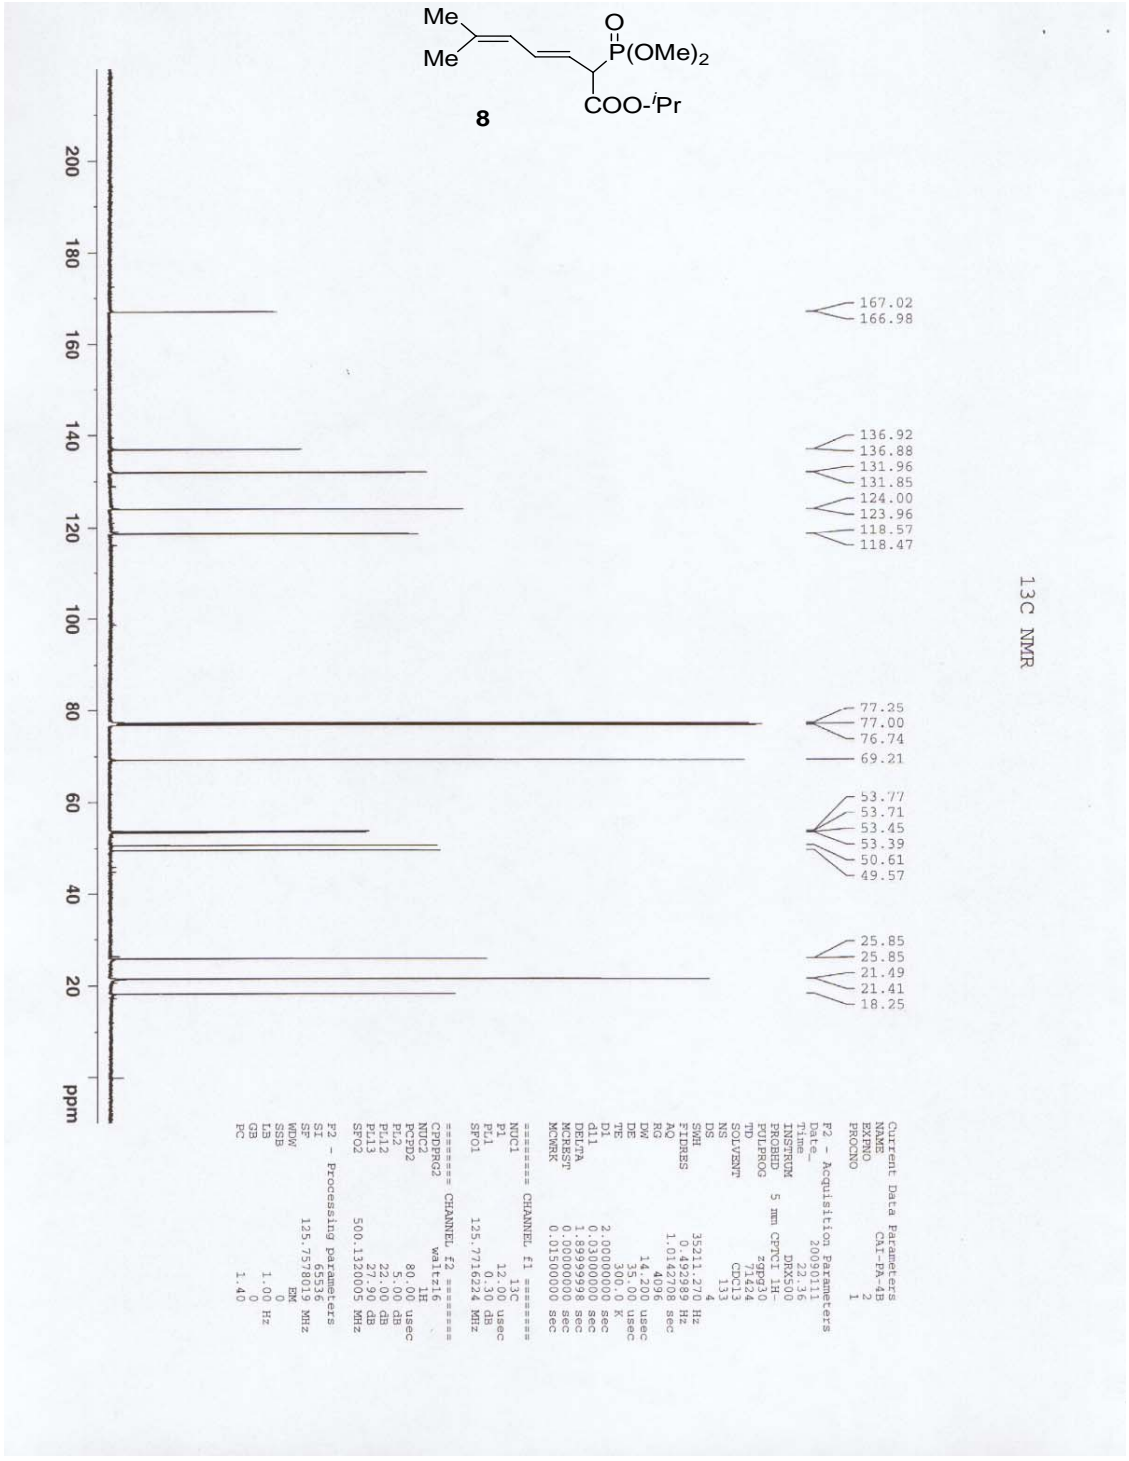

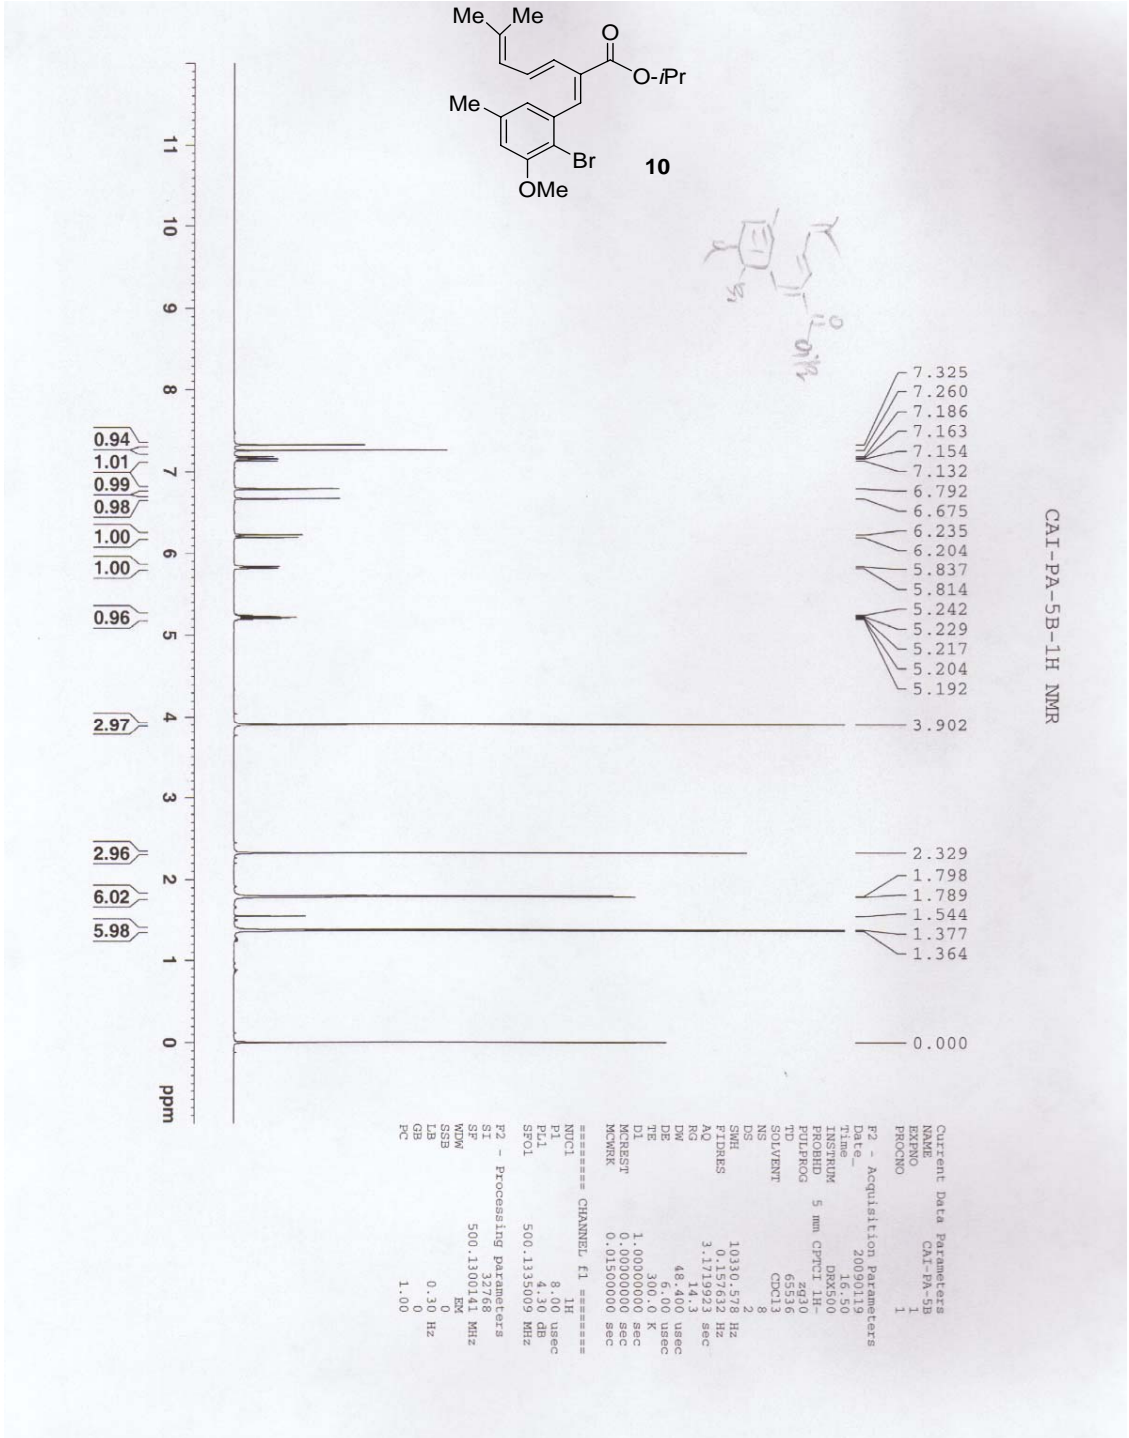

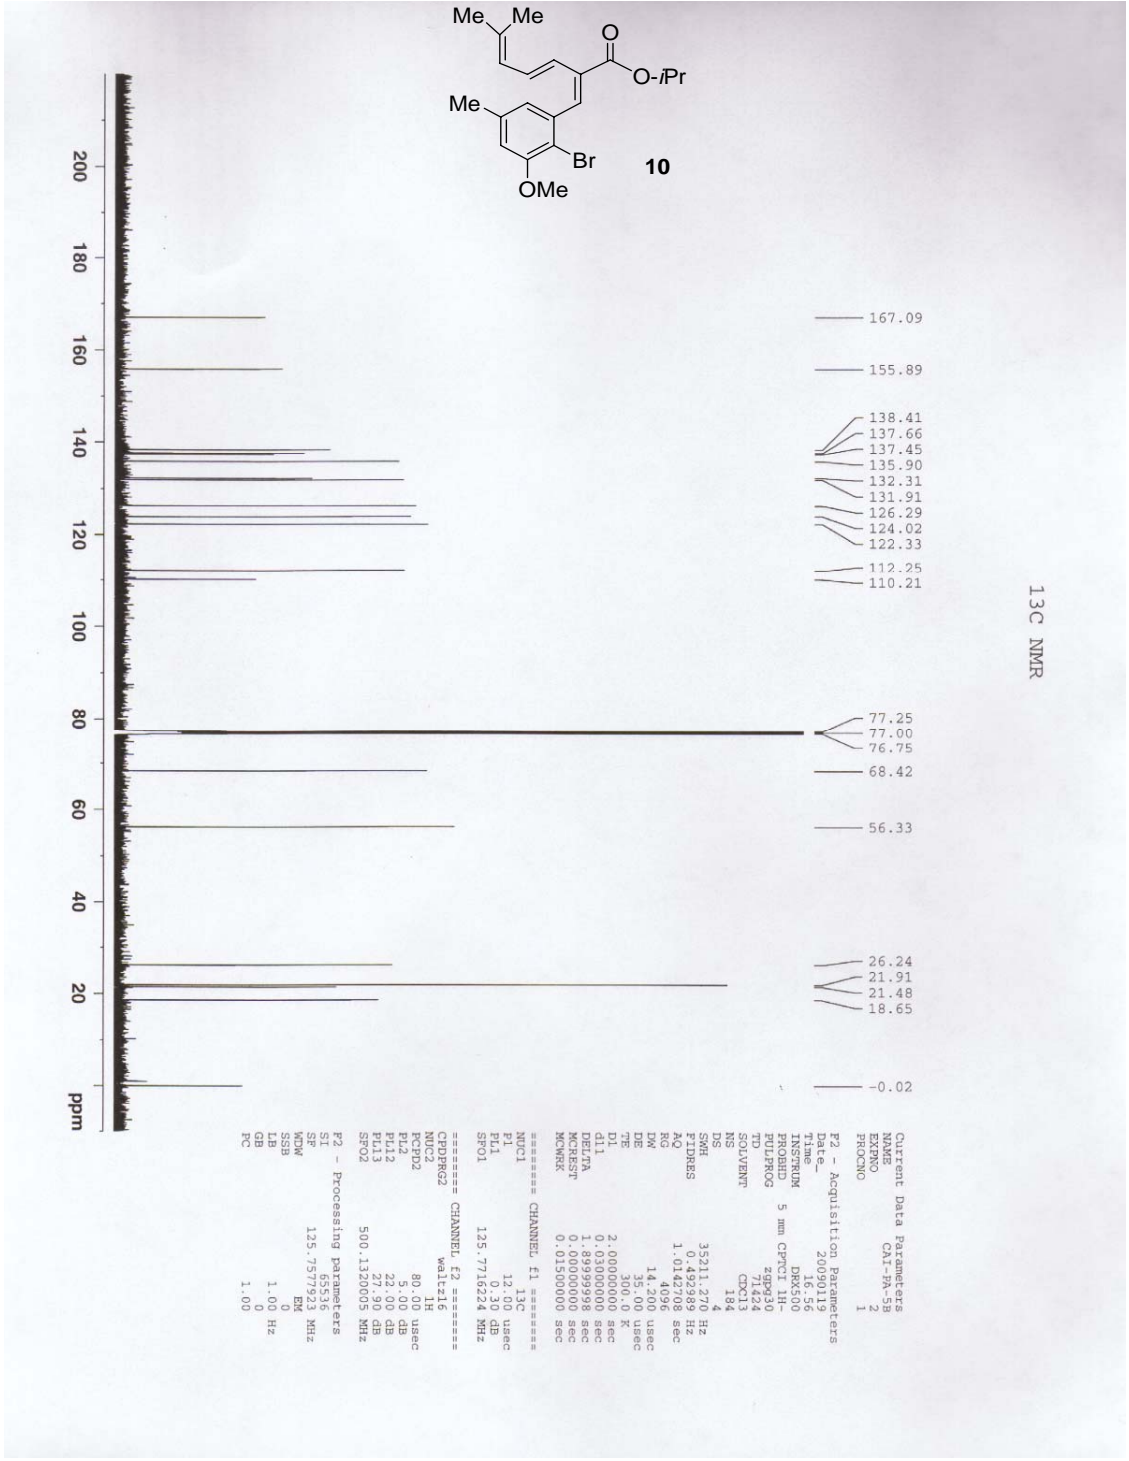

CAI-IV-SM-MA-1H NMR

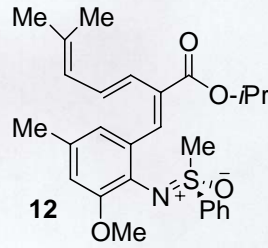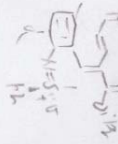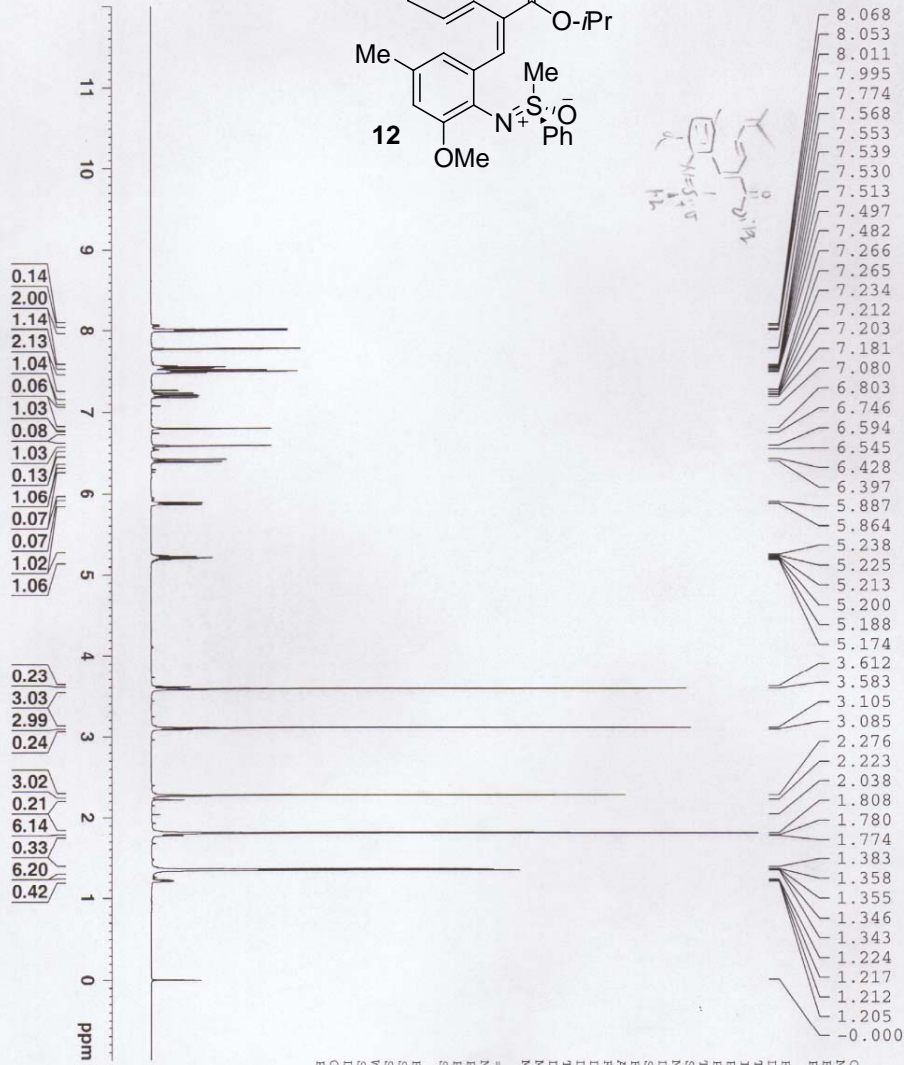

Current Data Parameters  
 NAME CAI-IV-PA  
 EXPNO 1  
 PROCNO 1

F2 - Acquisition Parameters  
 Date\_ 20090113  
 Time 14.34  
 INSTRUM DRX500  
 PROBHID 5 mm CP1H1H-  
 PULPROG zgpg30  
 TD 2830  
 SFO1 500.130013  
 SOLVENT CDCl3  
 NS 2  
 DS 2  
 SWH 10330.578 Hz  
 FIDRES 0.157632 Hz  
 AQ 3.1719223 sec  
 RG 5  
 DM 48.400 usec  
 DE 6.400 usec  
 TE 300.0 K  
 D1 1.00000000 sec  
 MCRRES 0.00000000 sec  
 MCWRR 0.01500000 sec

===== CHANNEL f1 =====  
 NUC1 1H  
 P1 8.00 usec  
 PL1 4.30 dB  
 SFO1 500.1335009 MHz

F2 - Processing parameters  
 SI 32768  
 SF 500.130013 MHz  
 KMDW 0  
 SSB 0  
 LB 0.30 Hz  
 GB 0  
 PC 1.00

13C NMR

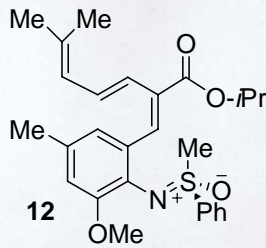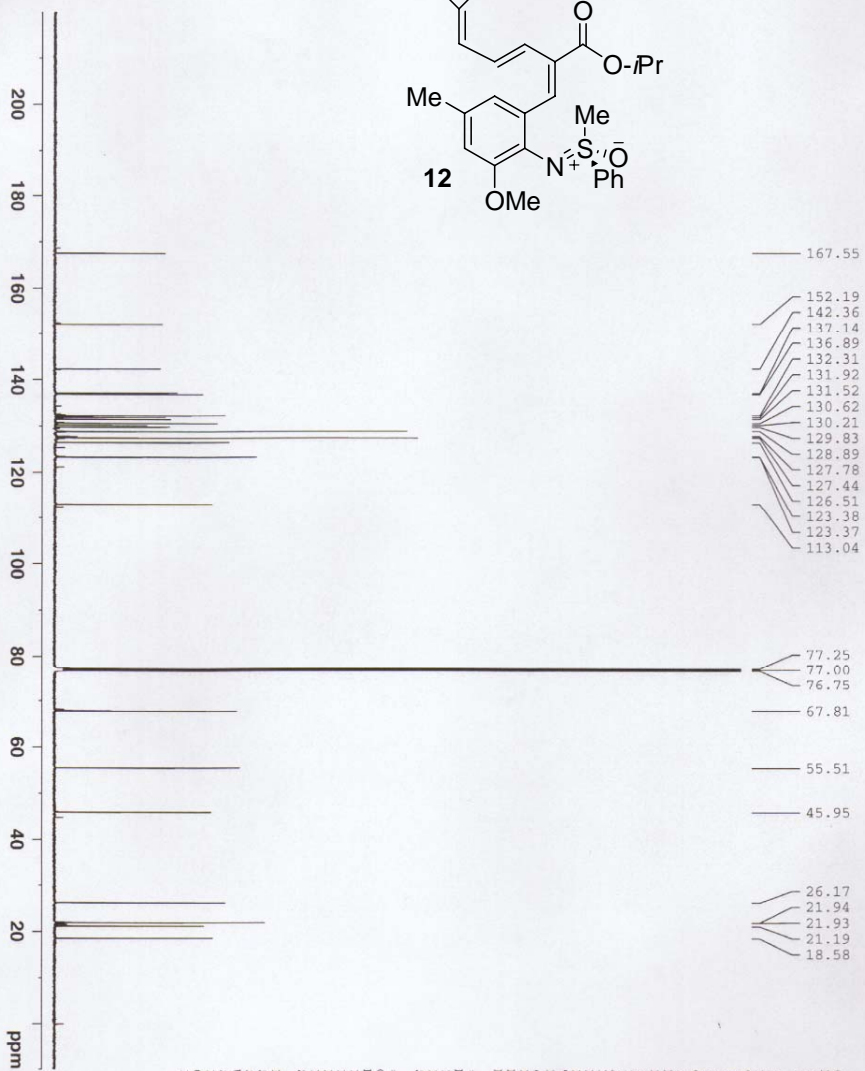

```

Current Data Parameters
NAME          CH-1V-PR
EXPNO        1
PROCNO       1

F2 - Acquisition Parameters
Time         20:29:43
Date_       14 41
INSTRUM     DRR500
PROBHD      5 mm CPXI 1H-
PULPROG     zgpg30
SOLVENT     CDCl3
NS          129
DS          4
SWH         35211.270 Hz
FIDRES     0.49289 Hz
AQ         1.014496 sec
RG         4096
DE         14.200 usec
TE         300.0 K
DELTA      2.000000 sec
MCKRESF    1.8999998 sec
MCKMRK     0.01500000 sec

===== CHANNEL f1 =====
NUC1        13C
P1          12.00 usec
PL1         0.30 dB
SFO1       125.7716224 MHz

===== CHANNEL f2 =====
CPDPRG2    waltz16
NUC2        1H
PCPD2      80.00 usec
PL2        5.00 dB
PL12       22.00 dB
PL13       22.00 dB
SFO2       500.1320005 MHz

F2 - Processing parameters
SI          65536
SF          125.757809 MHz
WDW         EM
SSB         0
LB          1.00 Hz
GB          0
PC          1.00
  
```

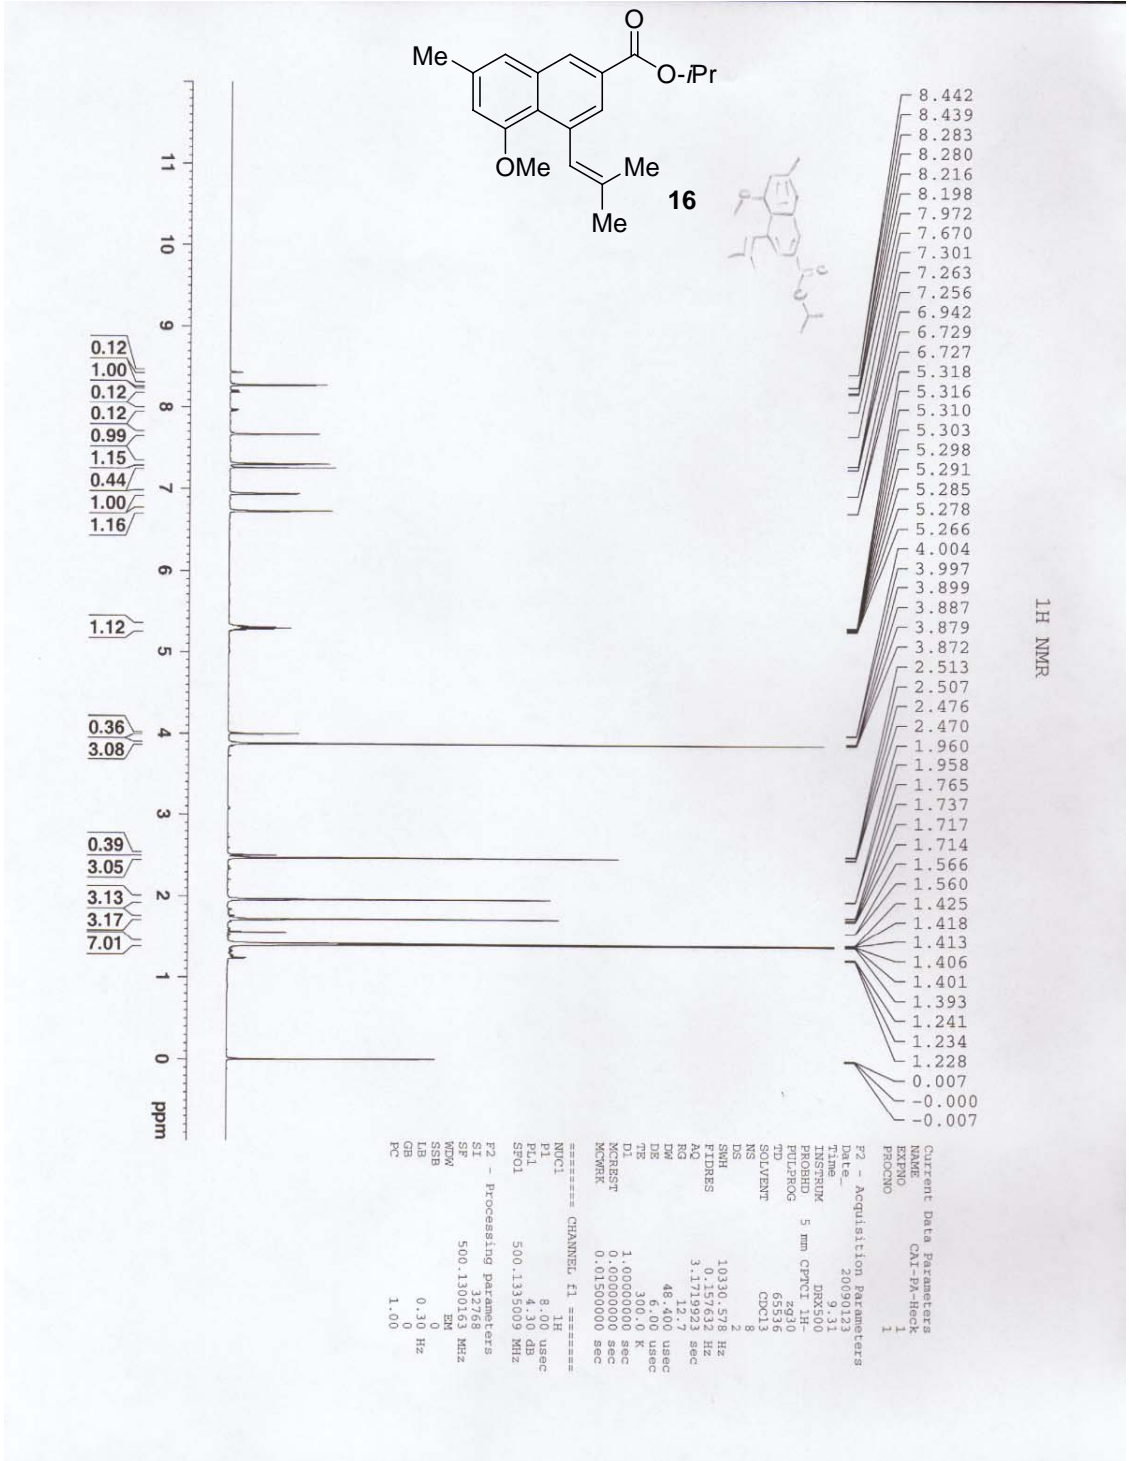

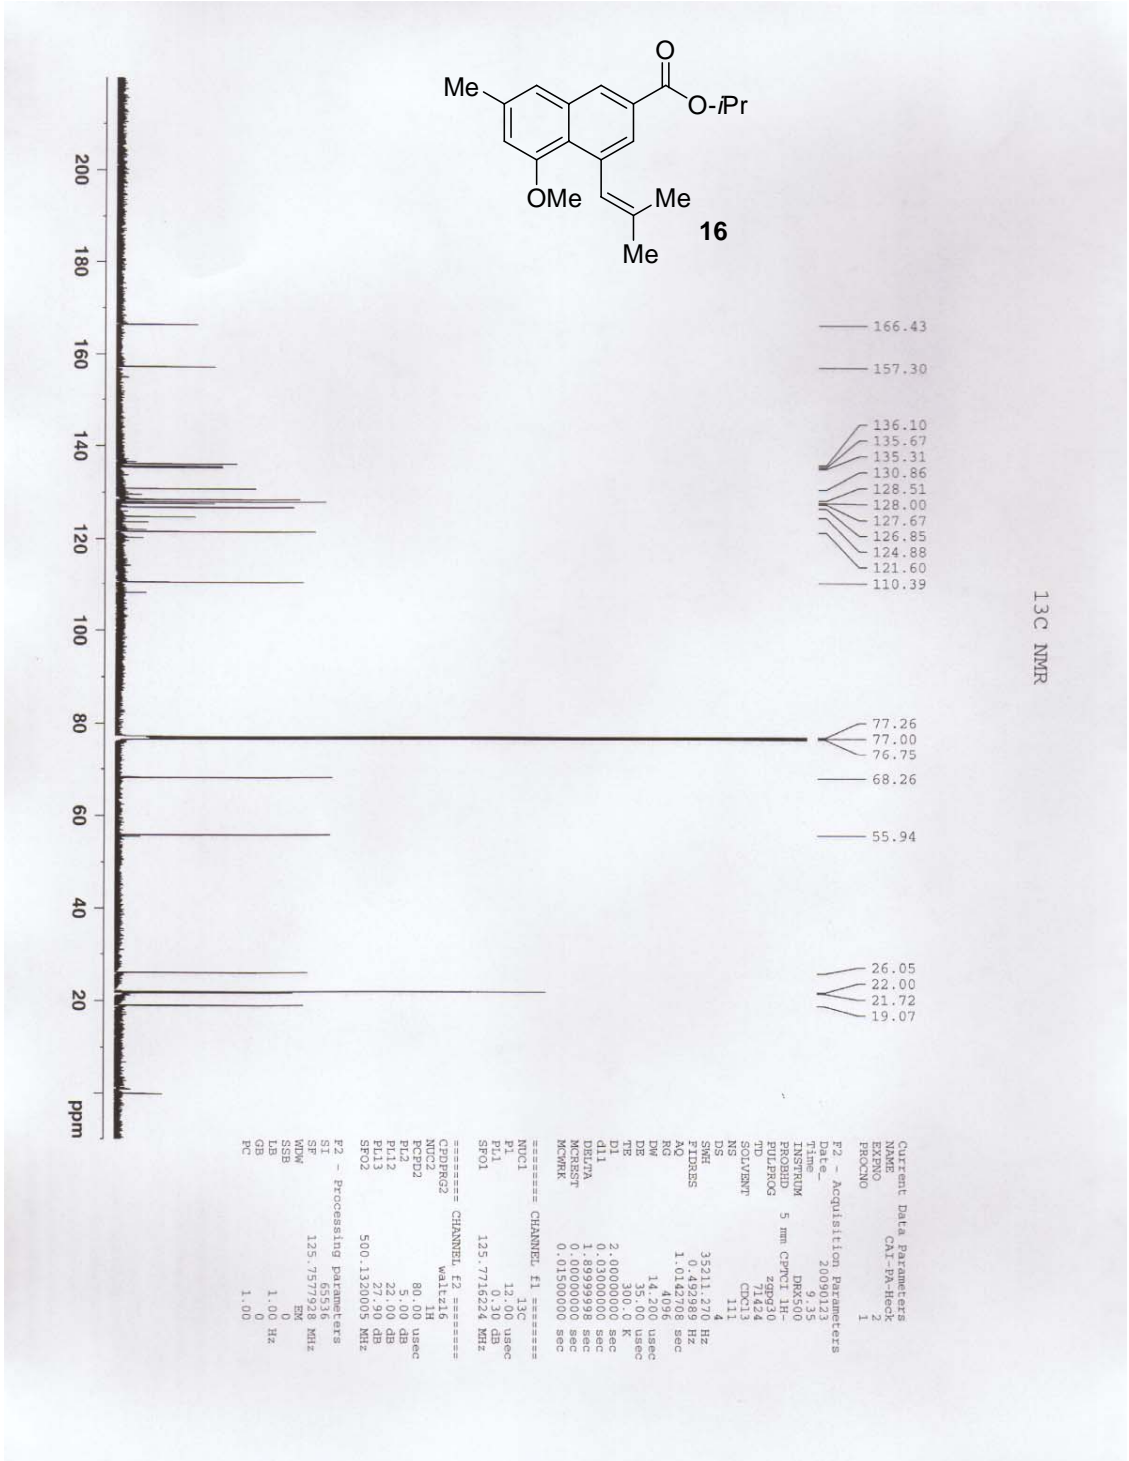



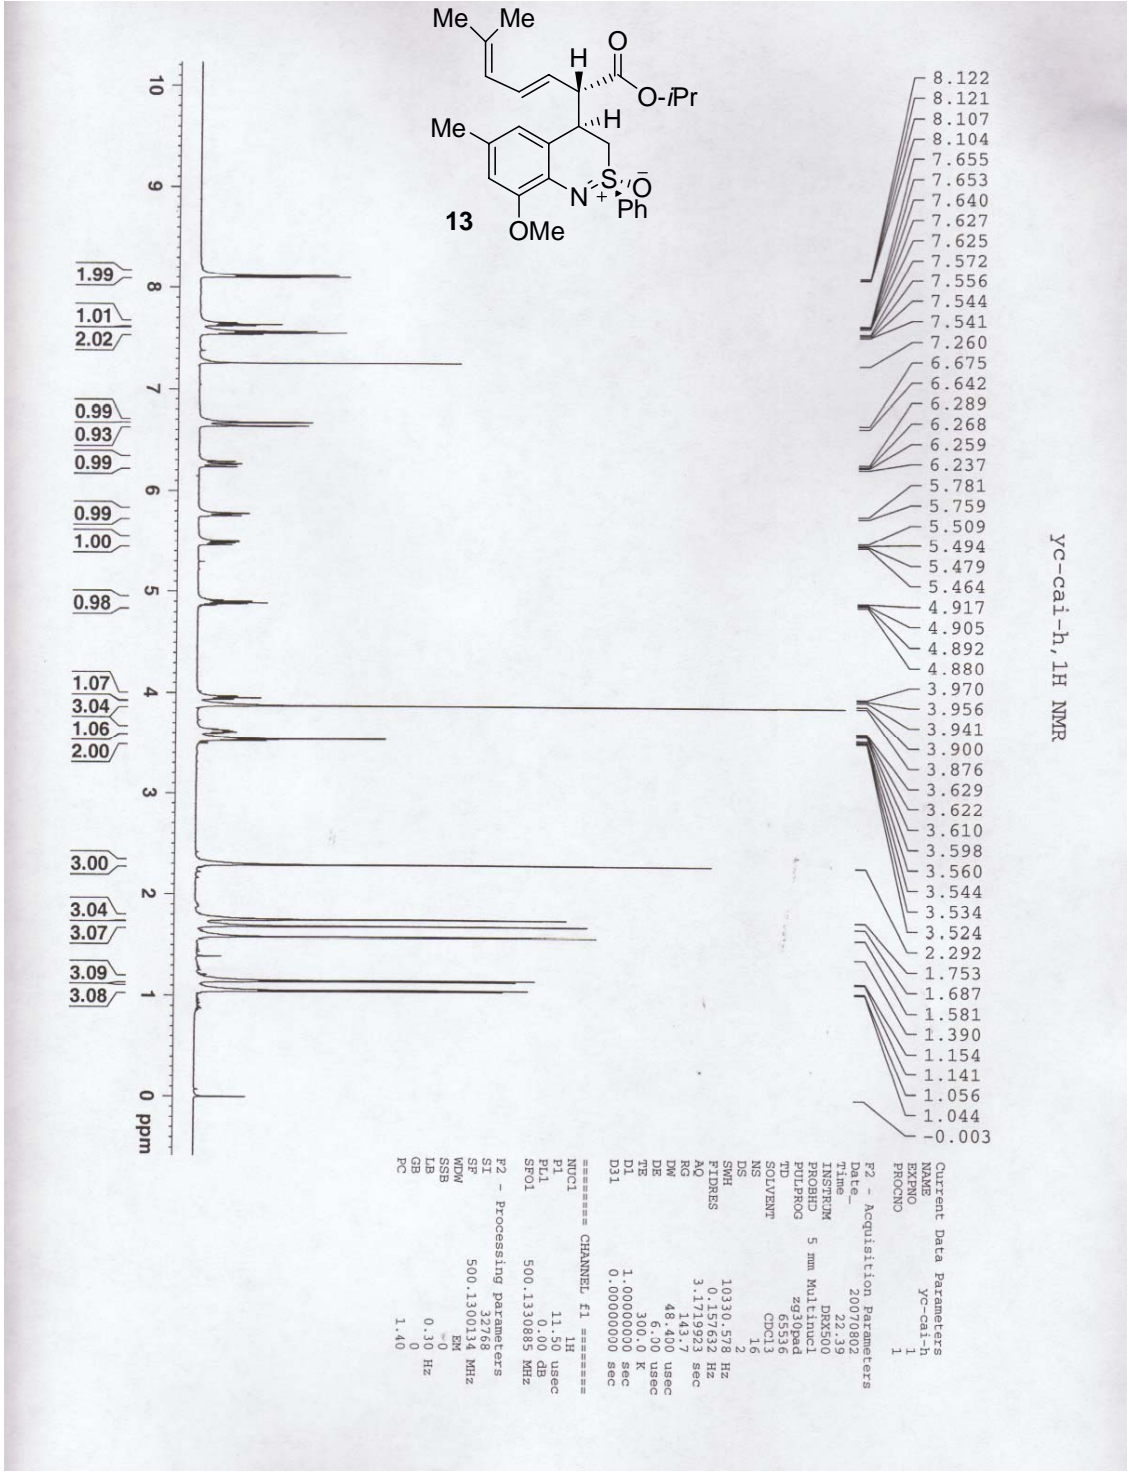

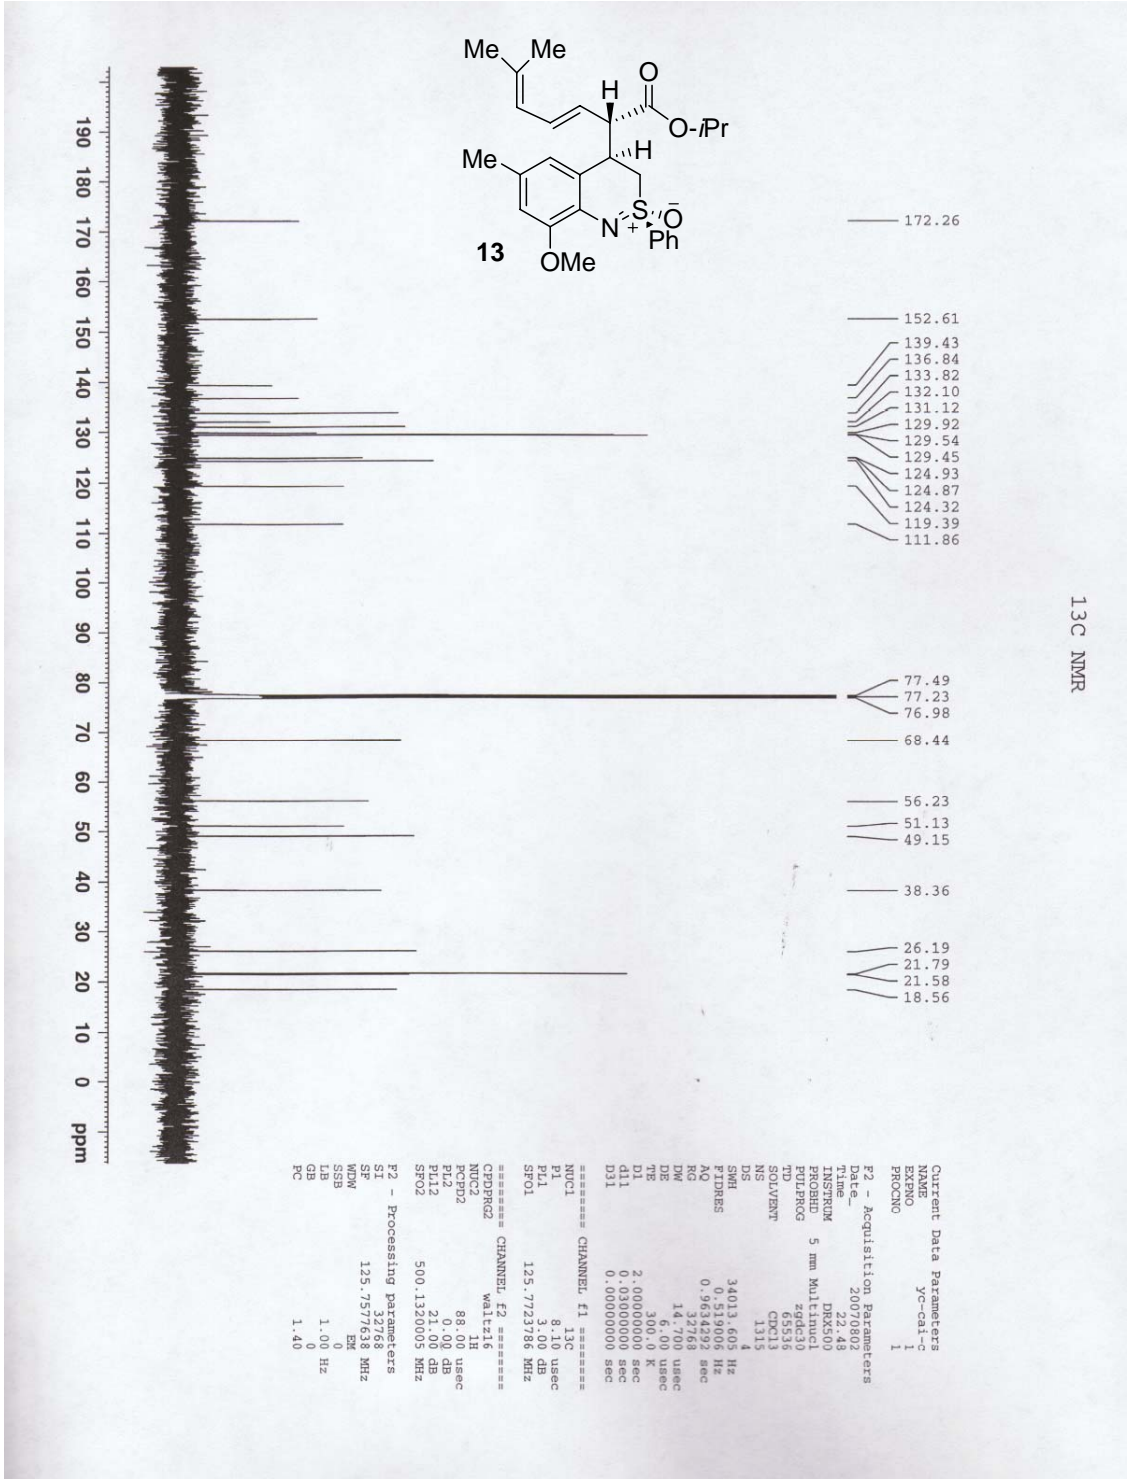

yc-cai-hh, 1H NMR

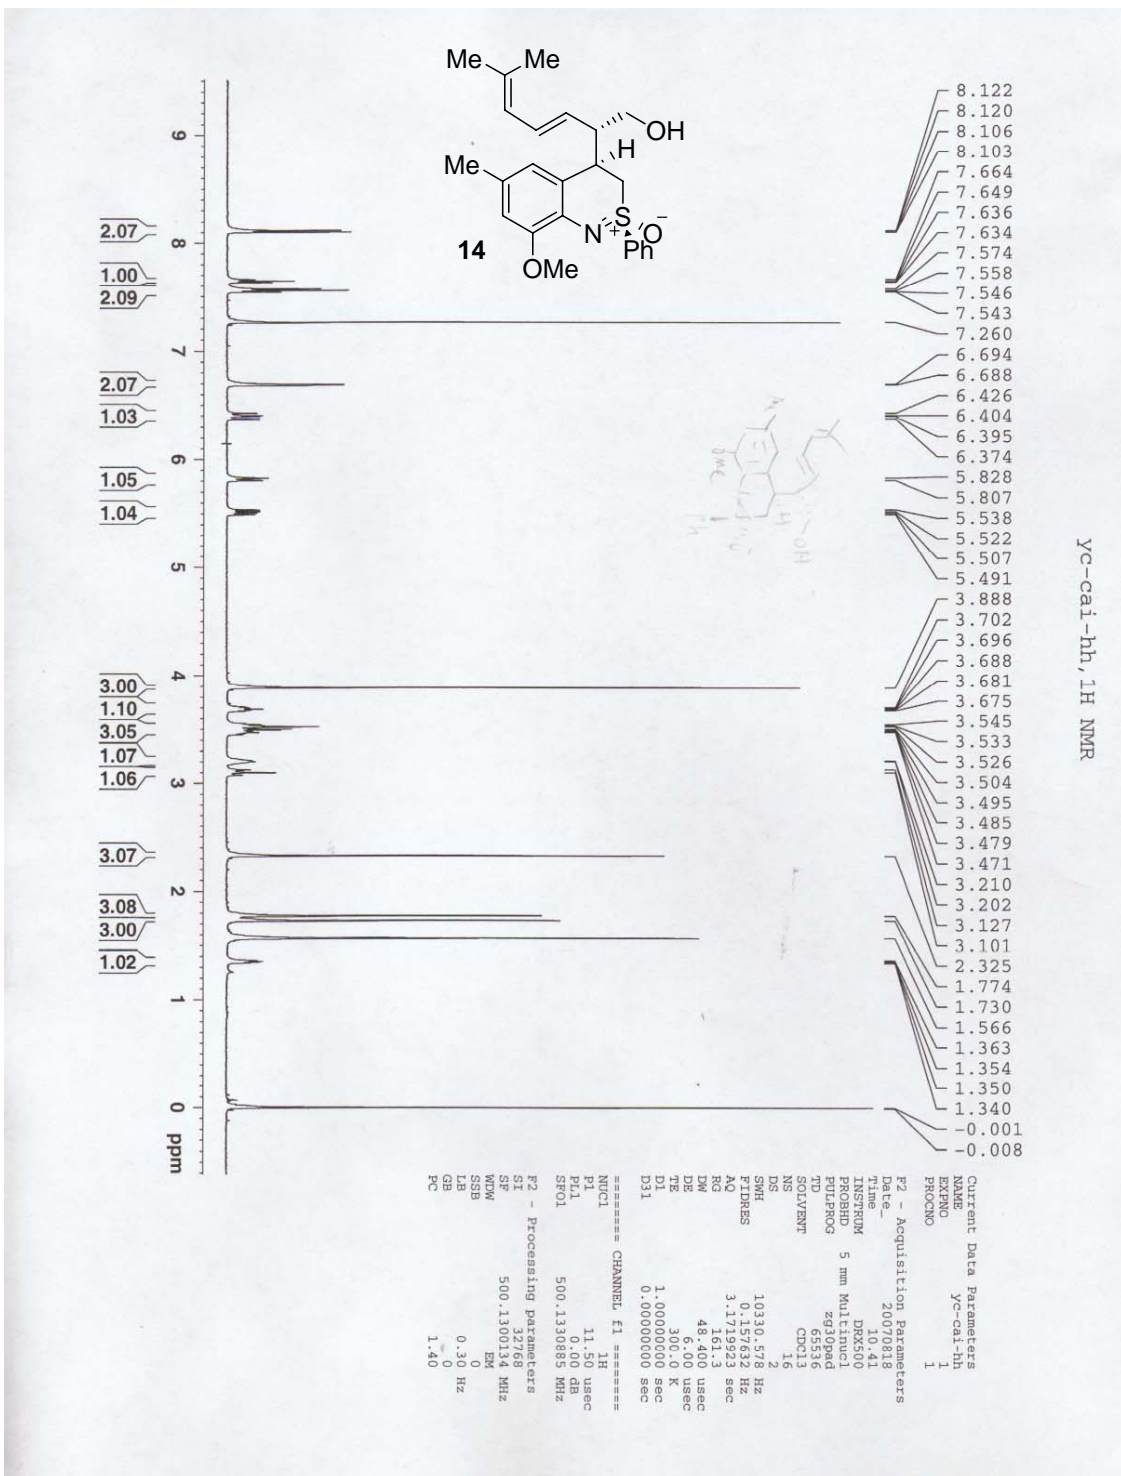

13C NMR

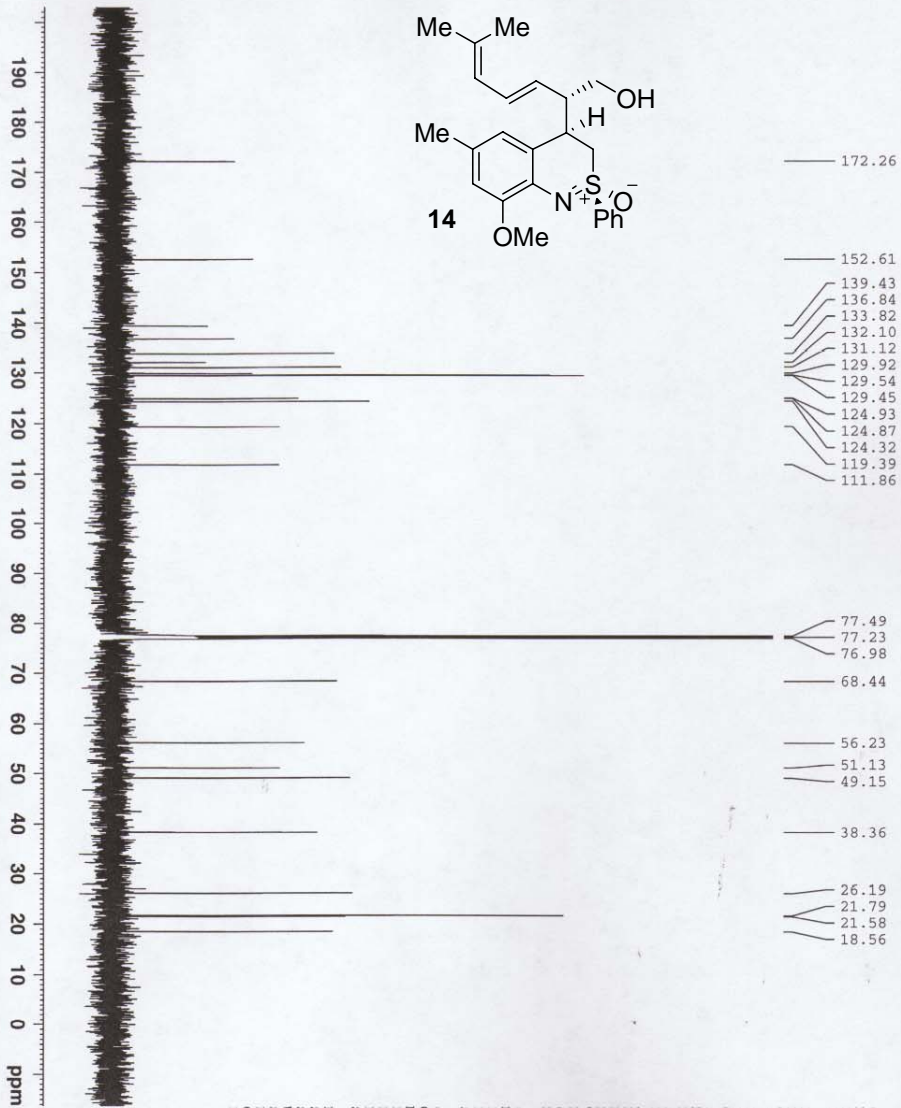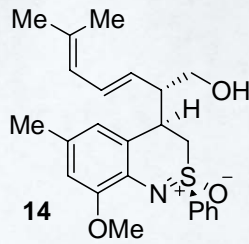

```

Current Data Parameters
NAME          YC-cal-c
EXPNO        1
PROCNO       1
PROCNAME     1

F2 - Acquisition Parameters
Time_        2007080
Time         22.48
INSTRUM     DRX500
PROBHD      5 mm Multinucl
PULPROG     zgpg30
TD           65536
SOLVENT     CDCl3
NS           1312
DS           4
SWH          34013.605 Hz
FIDRES       0.519006 Hz
AQ           0.9634292 sec
RG           32768
AQ           14.700 usec
DE           6.00 usec
TE           300.0 K
D1           2.00000000 sec
d11          0.03000000 sec
D31          0.00000000 sec

===== CHANNEL f1 =====
NUC1         13C
P1           8.10 usec
PL1          3.00 dB
SFO1        125.7723786 MHz

===== CHANNEL f2 =====
NUC2         13C
P2           88.00 usec
PL2          0.00 dB
SFO2        500.1320005 MHz

F2 - Processing parameters
SI           32768
SF           125.7577638 MHz
WDW          EM
SSB          0
LB           1.00 Hz
GB           0
PC           1.40
  
```

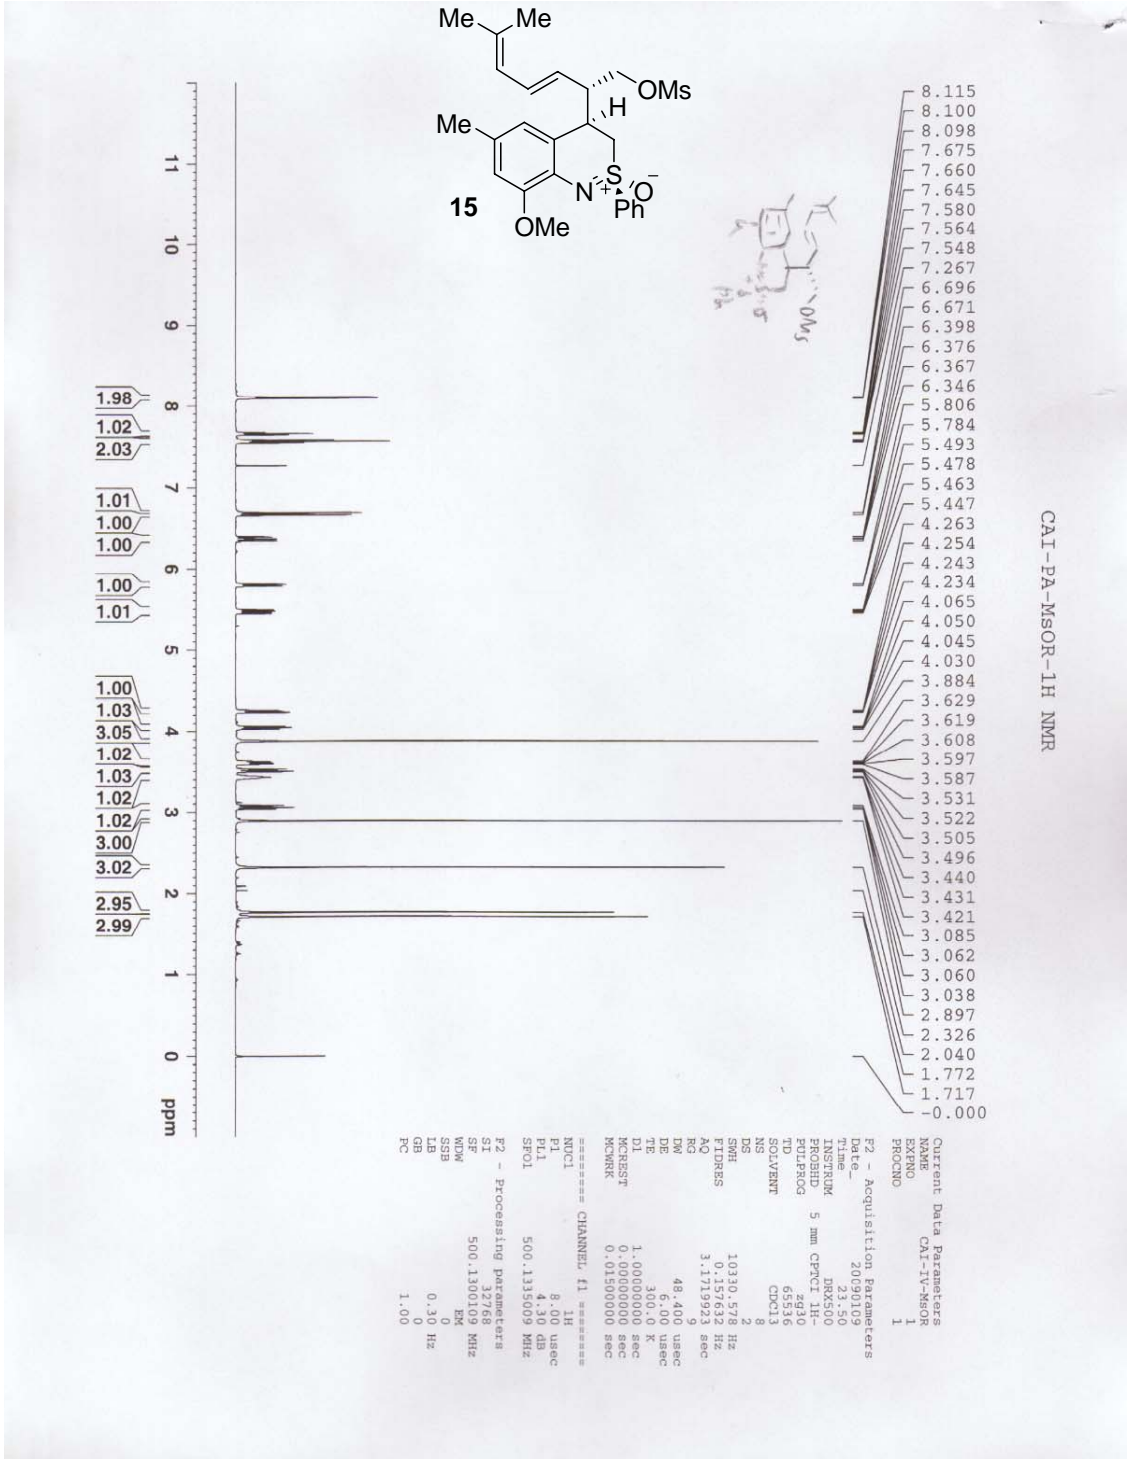

13C NMR

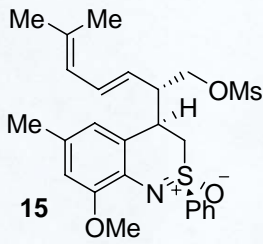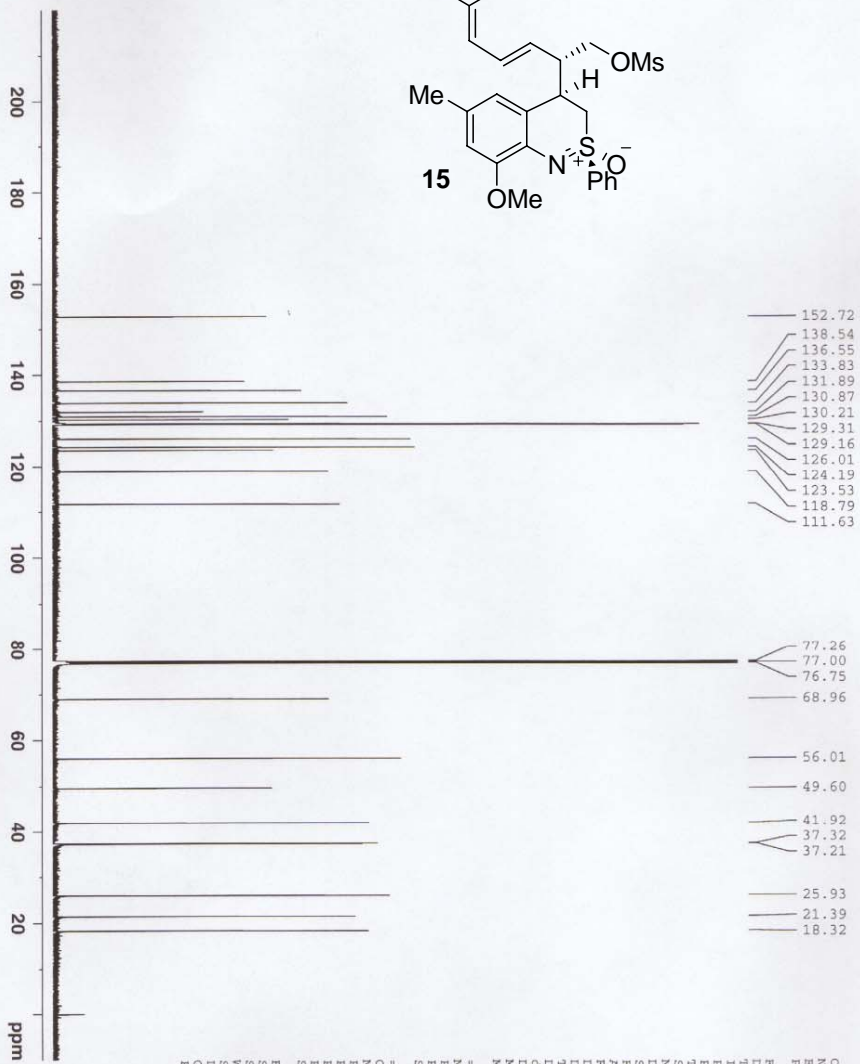

```

Current Data Parameters
NAME          CN1-1V-M00K
EXPNO         1
PROCNO        1

F2 - Acquisition Parameters
Date_         20090109
Time          12:48
INSTRUM      DDX500
PROBHD       5 mm CPTCI 1H-
PULPROG      zgpg30
TD            71424
SOLVENT      CDCl3
NUC1          13C
NUC2          13C
DS            4
SWH           35211.270 Hz
FIDRES        0.492989 Hz
AQ            1.0142708 sec
RG            14.200
DR            35.00 usec
DE            300.0 K
TE            300.0 K
D1            2.00000000 sec
d11           0.03000000 sec
DELTA         0.492989 sec
MAGNET        0.00000000 sec
KCMER        0.01500000 sec

===== CHANNEL f1 =====
NUC1          13C
PUL1          12.00 usec
PL1           0.30 dB
SFO1         125.7716224 MHz

===== CHANNEL f2 =====
NAME         waltz16
INSTRUM      IH
PROBHD       80.00 usec
PCPD2        5.00 dB
PL12         22.00 dB
PL13         22.00 dB
PL14         22.00 dB
SFO2         500.1320009 MHz

F2 - Processing parameters
SI            65536
SF            125.7577993 MHz
WDW           EM
SSB           0
LB            1.00 Hz
GB            0
PC            1.00
  
```
